# Supplementary material for: Microbiome Analysis of the Bamboo Aphid Melanaphis bambusae Infected with the Aphid Obligate Pathogen Conidiobolus obscurus (Entomophthoromycotina)
Source: MDPI journal article supplement (doi:10.3390/insects13111040), 2022-11-10
Supplement: s1 [file s1]

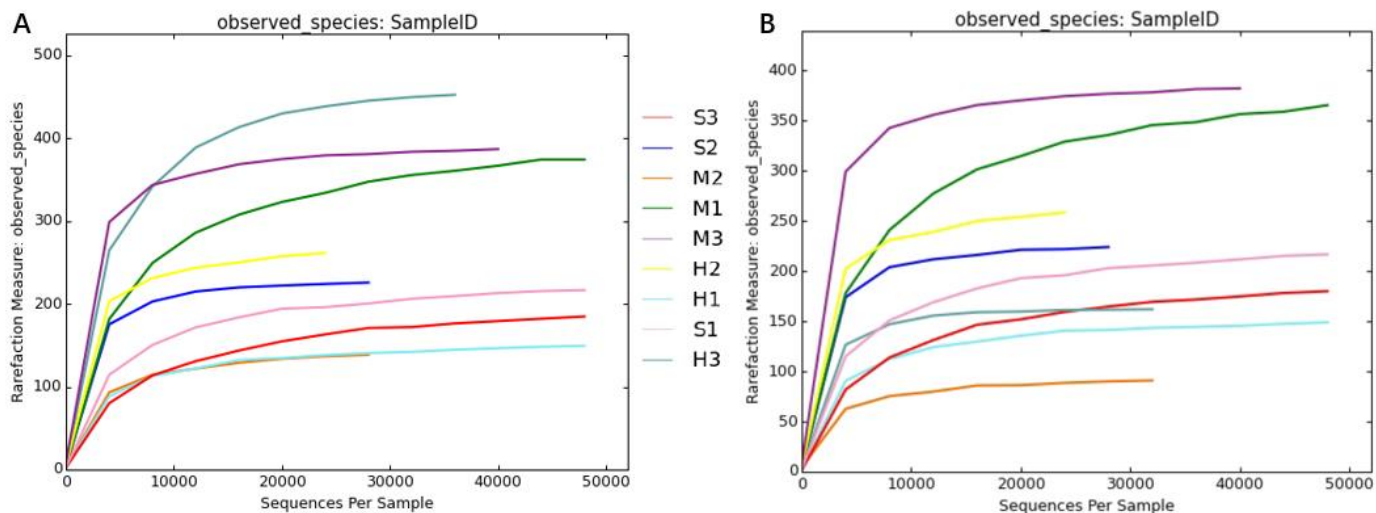

**Figure S1. Rarefaction curve of bacterial (A) and fungal (B) species under the three host conditions. H: healthy aphids, M: mycotized aphids; S: starved aphids. Three replicates were set up for each condition.**

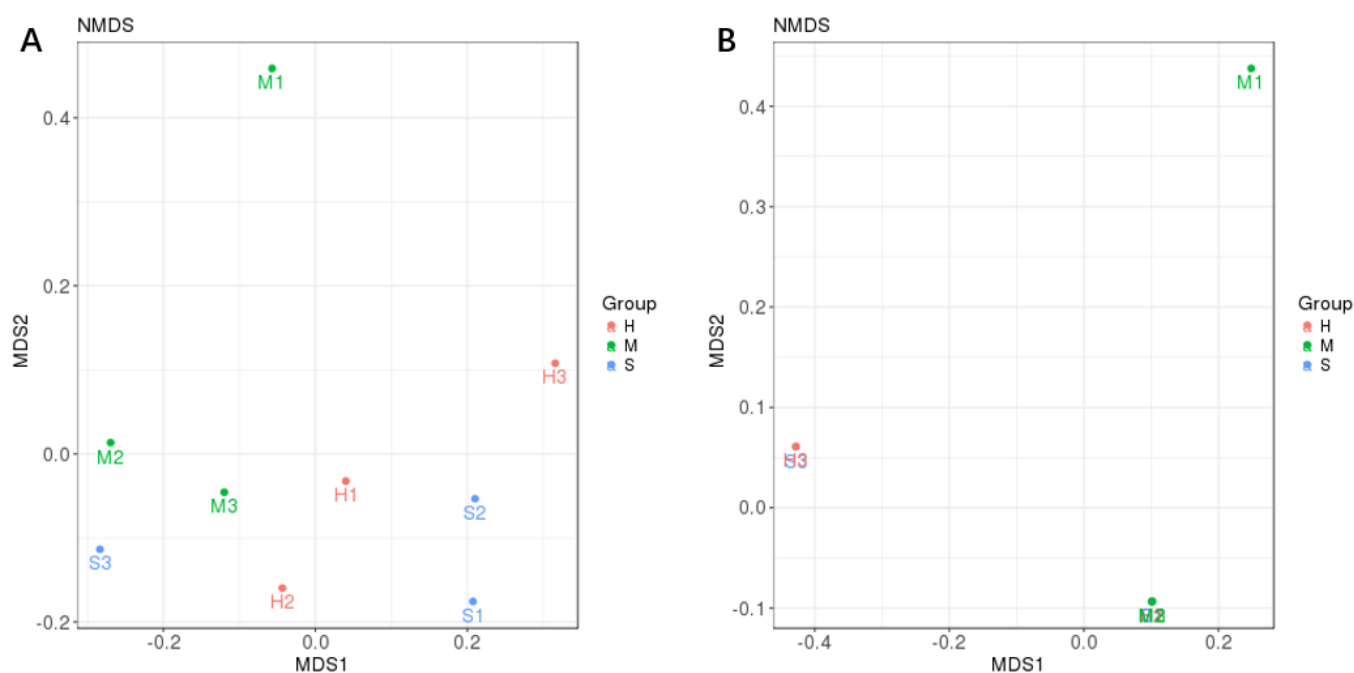

**Figure S2. NMDS analysis of aphid-associated bacterial (A) and fungal (B) flora under the three different conditions. H: healthy aphids, M: mycotized aphids; S: starved aphids. The points in the figure represent the samples, and the distance between the points indicates the degree of difference.**

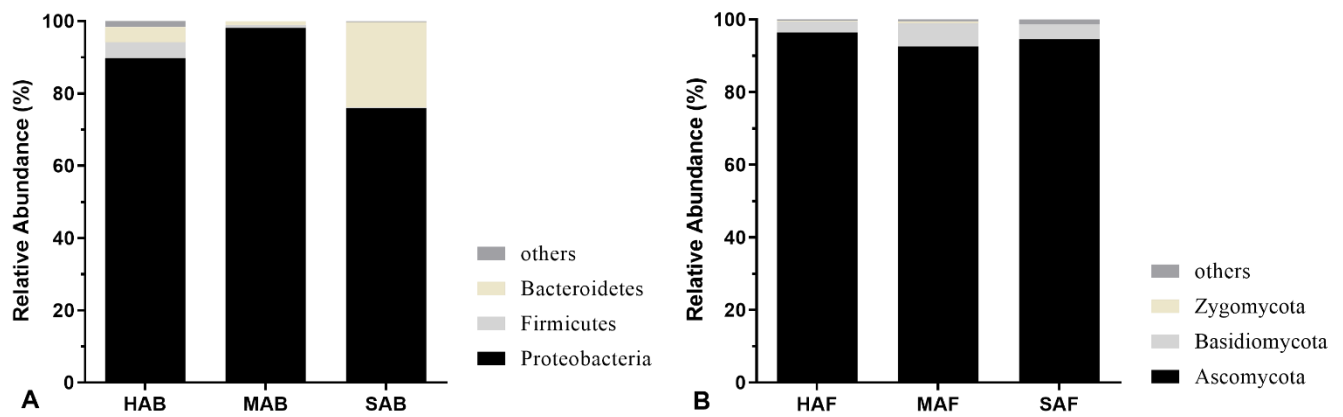

**Figure S3. Relative composition of bacterial (A) and fungal (B) phyla in aphid-associated microbial communities under the three different conditions.** HAB and HAF indicate healthy aphids, MAB and MAF mycotized aphids, SAB and SAF starved aphids.

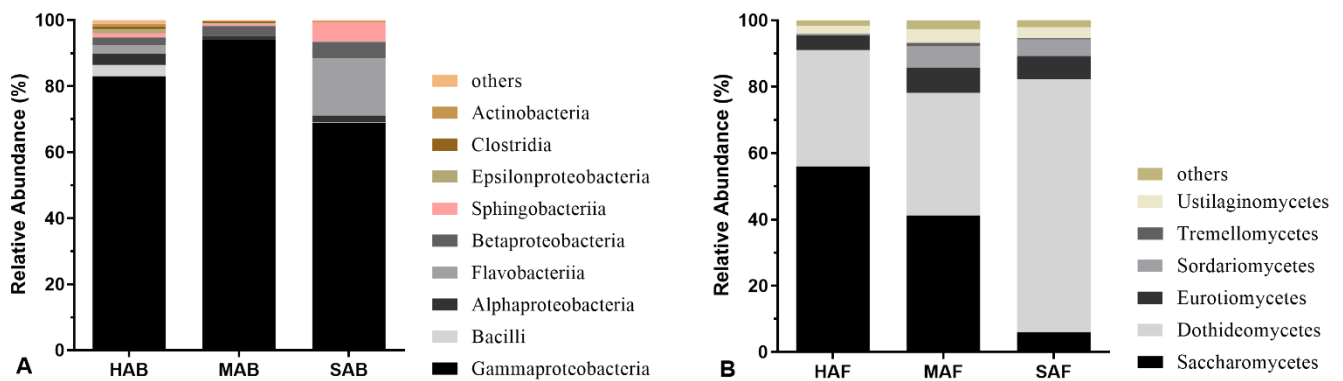

**Figure S4. Relative composition of bacterial (A) and fungal (B) classes in aphid-related microbiomes under the three different conditions.** HAB and HAF indicate healthy aphids, MAB and MAF mycotized aphids, SAB and SAF starved aphids.

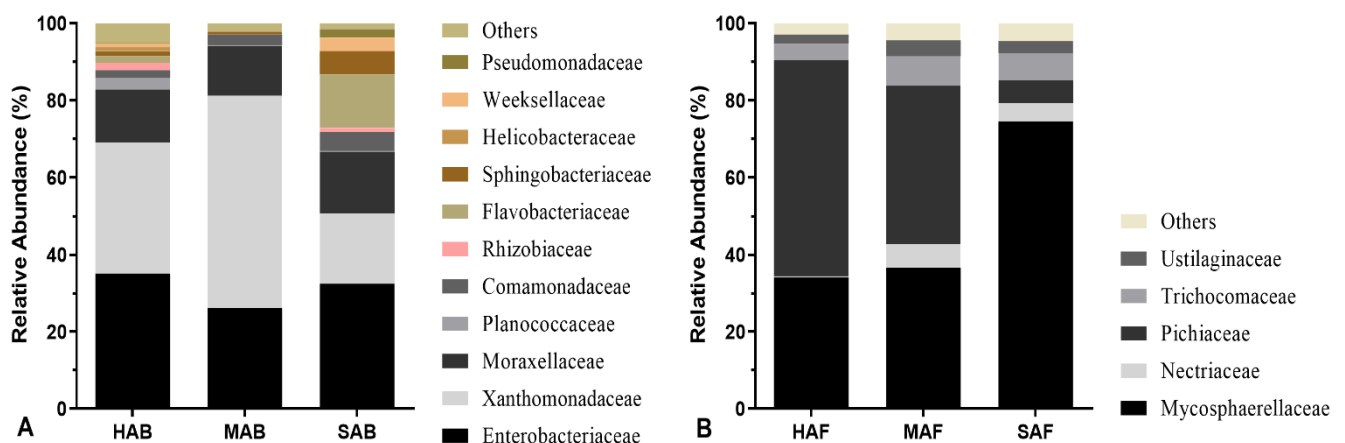

**Figure S5. Relative compositions of bacterial (A) and fungal (B) families in aphid-related microbiomes under the three different conditions.** HAB and HAF indicate healthy aphids, MAB and MAF mycotized aphids, SAB and SAF starved aphids.
